# Supplementary material for: Profile Characterization of Biogenic Amines in Glioblastoma Patients Undergoing Standard-of-Care Treatment
Source: Biomedicines. 2023 Aug 13;11(8):2261. doi: 10.3390/biomedicines11082261 (PMC10452138; doi:10.3390/biomedicines11082261)
Supplement: Supplementary file 1 [file biomedicines-11-02261-s001.zip › Supplementary tables 1 and 2 and 3. 6.25.2023.xlsx]

## Sheet: Post vs Pre Surgery
Supplementary Table S1
BinBase name	PubChem	Super class	Sub class	FC	P Value
Glycodeoxycholic acid	3035026	Sterol Lipids	C24 Bile acids	2.317	7.79e-05
Betonicine	164642	Organic acids	Amino Acids	6.7532	9.23e-05
Glycocholic acid	10140	Sterol Lipids	C24 Bile acids	2.3886	0.00318
3-Cysteinyl aectaminophen	NA	NA	NA	5.4817	0.00495
S-Methyl-3-thioacetaminophen	NA	NA	NA	4.8063	0.00577
Taurocholic acid	6675	Sterol Lipids	C24 Bile acids	3.9963	0.00997
N-glycine	750	Organic acids	Amino Acids	9.5157	0.0013
p-acetamidophenyl.beta.-D-glucuronide	NA	NA	NA	3.7234	0.0048
2-Hydroxy-5-sulfopyridine-3-carboxylic acid	NA	NA	NA	9.9399	0.0074
acetaminophen sulfate	86290013	Benzenoids	Aminophenols	2.9815	0.0095
2-Amino-3-methoxybenzoic acid	NA	NA	NA	2.1954	0.02
Dehydrofelodipine	NA	NA	NA	25.406	0.024
Mannitol	6251	Carbohydrates	Sugar alcohols	0.0041057	1.96e-19
Sorbitol	5780	Carbohydrates	Sugar alcohols	0.0049699	2.75e-19
Linoleic acid	5280450	Fatty Acyls	Unsaturated FA	0.30858	1.51e-10
1-Methyl nicotinamide	457	Alkaloids	Pyridine alkaloids	0.28394	1.78e-09
Nudifloramide	NA	NA	NA	0.33908	2.81e-08
Hexadecanedioic acid	10459	Fatty Acyls	Dicarboxylic acids	0.49581	5.49e-05
3-Hydroxybutyric acid	441	Fatty Acyls	Hydroxy FA	0.22995	0.0002
Riluzole	5070	Organoheterocyclic compounds	Benzothiazoles	0.36775	0.0036
Bupivacaine	NA	NA	NA	0.15754	0.0041
Lactitol	157355	Carbohydrates	Sugar alcohols	0.034197	0.008
1-hydroxymidazolam.beta.-D-glucuronide	NA	NA	NA	0.17726	0.0414

## Sheet: Post vs Pre Radiation
Supplementary Table S2
BinBase name	PubChem	Super class	Sub class	FC	P Value
N-Methylisoleucine	5288628	Organic acids	Amino acids	2.2365	0.0011
4-Methyl-5-thiazoleethanol	NA	NA	NA	2.4598	0.042
6-Hydroxycaproic acid	14490	Fatty Acyls	Hydroxy FA	2.0522	0.049
Famotidine	3325	Organoheterocyclic compunds	Thiazoles	0.13406	0.0074
N-Isovalerylglycine	NA	NA	NA	0.45209	0.012
3-Methylcrotonylglycine	169485	Organic acids	Amino acids	0.40052	0.0131

## Sheet: Post treatment vs Pre radiation
Supplementary Table S3
BinBase name	PubChem	Super class	Sub class	FC	P Value
N-Methylisoleucine	5288628	Organic acids	Amino acids	2.0375	0.0008
Coniferylaldehyde	NA	NA	NA	2.9554	0.003
4-Methyl-5-thiazoleethanol	NA	NA	NA	2.5325	0.0049
DMSO	NA	NA	NA	2.7352	0.0081
Glycerophophocholine	NA	NA	NA	2.439	0.0093
Diatrizoic acid	NA	NA	NA	2.6119	0.011
Bradykinin	439201	Organic acids	Oligopeptides	2.4472	0.044
L-Propionyl carnitine	10917	Organic nitrogen compounds	Carnitines	0.46888	0.0002
3-Methylcrotonylglycine	169485	Organic acids	Amino acids	0.43436	0.0005
N-Isovalerylglycine	NA	NA	NA	0.4588	0.0007
Famotidine	3325	Organoheterocyclic compunds	Thiazoles	0.25496	0.0019
1,5-Pentanediamine	NA	NA	NA	0.39674	0.0028
Chenodeoxycholic acid 24-acyl-.beta.-D-glucuronide	NA	NA	NA	0.43755	0.008
Acetaminophen sulfate	86290013	Benzenoids	Aminophenols	0.2644	0.035
2-Amino-3-methoxybenzoic acid	NA	NA	NA	0.41198	0.035
